# Supplementary material for: Efficacy and Potential Mechanism of Essential Oils of Three Labiatae Plants against the Pathogenic Fungi of Root Rot Disease in Atractylodes chinensis
Source: MDPI journal article supplement (doi:10.3390/horticulturae9101136), 2023-10-15
Supplement: s1 [file s1]

**Table S1.** Chemical composition of EO from *O. vulgare*.

| No.                  | $t_R^1$ | Component                                                        | Content [%] <sup>2</sup> |
|----------------------|---------|------------------------------------------------------------------|--------------------------|
| 1                    | 5.42    | m-Cymene                                                         | 0.03±0.01                |
| 2                    | 6.61    | 3,5,7-Octatrien-2-ol, 2,6-dimethyl-, (3E,5E)-                    | 0.26±0.03                |
| 3                    | 6.98    | Bicyclo[3.1.0]hexane-6-methanol, 2-hydroxy-1,4,4-trimethyl-1,3-  | 0.08±0.05                |
| 4                    | 7.61    | bis-(1,1-dimethylethyl)-benzene                                  | 0.33±0.00                |
| 5                    | 8.20    | Thymol                                                           | 12.00±0.27               |
| 6                    | 8.36    | Carvacrol                                                        | 86.23±0.77               |
| 7                    | 15.87   | Octadecane, 3-ethyl-5-(2-ethylbutyl)-                            | 0.03±0.02                |
| 8                    | 16.43   | 1,1,3,3,5,5,7,7,9,9,11,11,13,13,15,15-hexadecamethyloctasiloxane | 0.26±0.03                |
| 9                    | 28.87   | 2,2'-Methylenebis(6-tert-butyl-4-methylphenol)                   | 0.03±0.01                |
| Total identified [%] |         |                                                                  | 99.25                    |

<sup>1</sup> Retention time. <sup>2</sup> Relative percentage obtained from peak area. The data are reported as the means ± standard deviation of three samples.

**Table S2.** Chemical composition of EO from *T. mongolicus*.

| No.                  | $t_R^1$ | Component                                      | Content [%] <sup>2</sup> |
|----------------------|---------|------------------------------------------------|--------------------------|
| 1                    | 5.49    | β-pinene                                       | 1.79±0.05                |
| 2                    | 5.87    | β-myrcene                                      | 0.28±0.01                |
| 3                    | 6.03    | n-Decane                                       | 0.06±0.00                |
| 4                    | 6.42    | 3-Carene                                       | 0.09±0.00                |
| 5                    | 6.59    | Terpinolene                                    | 0.10±0.07                |
| 6                    | 6.84    | O-Cymene                                       | 56.63±0.22               |
| 7                    | 7.73    | γ-Terpinene                                    | 21.96±0.59               |
| 8                    | 10.24   | Cyclohexyldimethoxymethylsilane                | 0.20±0.00                |
| 9                    | 11.06   | Tetradecane                                    | 0.18±0.05                |
| 10                   | 11.28   | 2,6-Dimethylundecene                           | 0.05±0.01                |
| 11                   | 12.58   | Dodecane, 2,6,11-trimethyl-                    | 0.17±0.07                |
| 12                   | 13.07   | Thymol                                         | 12.05±0.82               |
| 13                   | 17.04   | Butylated Hydroxytoluene                       | 0.05±0.01                |
| 14                   | 17.21   | 2,4-Di-tert-butylphenol                        | 0.07±0.00                |
| 15                   | 31.08   | α-Naginatene                                   | 0.09±0.09                |
| 16                   | 32.22   | Erythrodil 3-acetate                           | 1.17±0.97                |
| 17                   | 35.98   | 2,2'-Methylenebis(6-tert-butyl-4-methylphenol) | 0.38±0.15                |
| 18                   | 36.75   | Betulin                                        | 0.08±0.02                |
| 19                   | 38.39   | 3-Acetylpupeol                                 | 2.10±0.78                |
| Total identified [%] |         |                                                | 97.49                    |

<sup>1</sup> Retention time. <sup>2</sup> Relative percentage obtained from peak area. The data are reported as the means ± standard deviation of three samples.

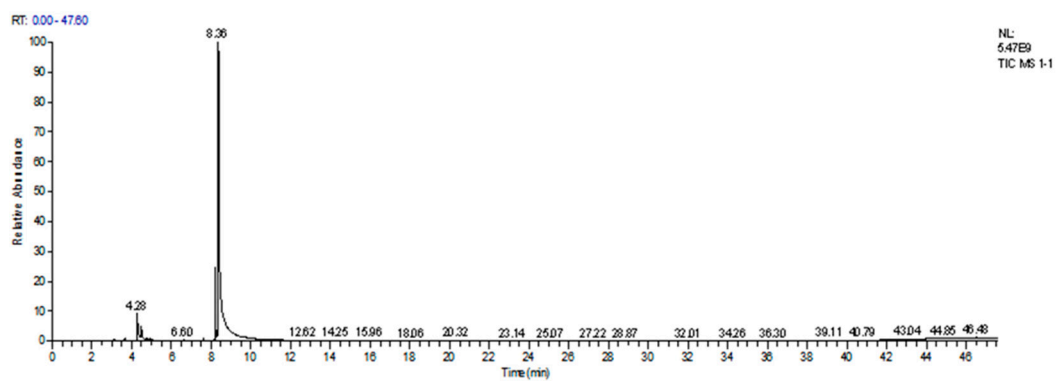

Figure. S1. GC-MS chromatogram of *Origanum vulgare* essential oil.

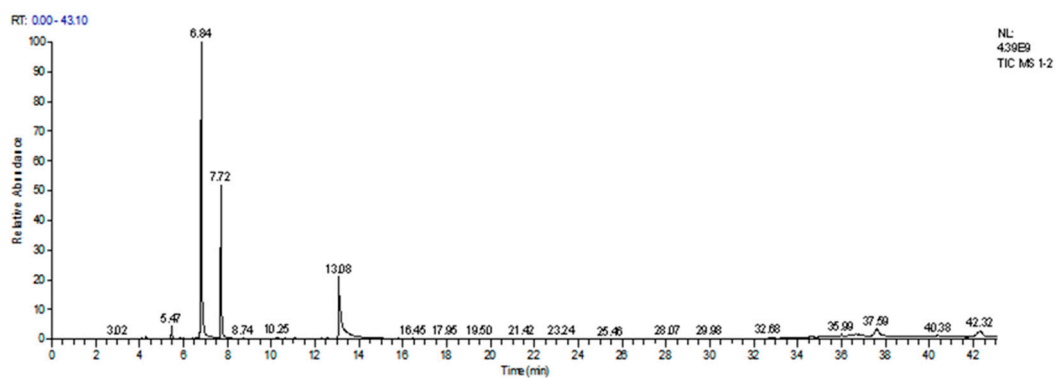

Figure. S2. GC-MS chromatogram of *Thymus mongolicus* essential oil.
